# Supplementary material for: New Wolbachia pipientis Genotype Increasing Heat Stress Resistance of Drosophila melanogaster Host Is Characterized by a Large Chromosomal Inversion
Source: MDPI journal article supplement (doi:10.3390/ijms232416212), 2022-12-19
Supplement: s1 [file s1]

**Table S1.** The genes of wMelPlus *W. pipientis* strain located in the identified inversion. 'Hypothetical proteins' are excluded.

| locus_tag      | length_bp | gene   | EC_number | COG     | product                                                                                           |
|----------------|-----------|--------|-----------|---------|---------------------------------------------------------------------------------------------------|
| WMELPLUS_00339 | 363       |        |           | COG3039 | IS5 family transposase ISWpi1                                                                     |
| WMELPLUS_00342 | 1173      | sucB   | 2.3.1.61  | COG0508 | Dihydrolipoyllysine-residue succinyltransferase component of 2-oxoglutarate dehydrogenase complex |
| WMELPLUS_00343 | 909       | hemC   | 2.5.1.61  | COG0181 | Porphobilinogen deaminase                                                                         |
| WMELPLUS_00344 | 888       | murB   | 1.3.1.98  | COG0812 | UDP-N-acetylenolpyruvoylglucosamine reductase                                                     |
| WMELPLUS_00351 | 1707      |        |           | COG1132 | putative ABC transporter ATP-binding protein                                                      |
| WMELPLUS_00353 | 1707      | argS   | 6.1.1.19  |         | Arginine--tRNA ligase                                                                             |
| WMELPLUS_00358 | 624       | ccmA   | 7.6.2.5   | COG4133 | Cytochrome c biogenesis ATP-binding export protein CcmA                                           |
| WMELPLUS_00360 | 1866      | aspS   | 6.1.1.12  |         | Aspartate--tRNA ligase                                                                            |
| WMELPLUS_00361 | 1263      | proP_2 |           |         | Proline/betaine transporter                                                                       |
| WMELPLUS_00362 | 924       | rluC   | 5.4.99.24 | COG0564 | Ribosomal large subunit pseudouridine synthase C                                                  |
| WMELPLUS_00363 | 981       | acoA   | 1.1.1.-   | COG1071 | Acetoin:2,6-dichlorophenolindophenol oxidoreductase subunit alpha                                 |
| WMELPLUS_00365 | 1320      | miaB   | 2.8.4.3   | COG0621 | tRNA-2-methylthio-N(6)-dimethylallyladenosine synthase                                            |
| WMELPLUS_00366 | 993       | dtpA   |           | COG3104 | Dipeptide and tripeptide permease A                                                               |
| WMELPLUS_00367 | 522       | dtpC   |           | COG3104 | Dipeptide and tripeptide permease C                                                               |
| WMELPLUS_00368 | 3336      | ileS   | 6.1.1.5   | COG0060 | Isoleucine--tRNA ligase                                                                           |

|                |      |         |          |         |                                                      |
|----------------|------|---------|----------|---------|------------------------------------------------------|
| WMELPLUS_00370 | 2340 | pheT    | 6.1.1.20 | COG0072 | Phenylalanine--tRNA ligase beta subunit              |
| WMELPLUS_00372 | 726  | atpB    |          | COG0356 | ATP synthase subunit a                               |
| WMELPLUS_00373 | 228  | atpH_1  |          |         | ATP synthase subunit c                               |
| WMELPLUS_00374 | 480  | atpG_1  |          |         | ATP synthase subunit b'                              |
| WMELPLUS_00375 | 477  | atpF    |          |         | ATP synthase subunit b                               |
| WMELPLUS_00377 | 1053 | ctaA    | 1.3.-.-  | COG1612 | Heme A synthase                                      |
| WMELPLUS_00378 | 2076 | accA1   |          | COG4770 | Acetyl-/propionyl-coenzyme A carboxylase alpha chain |
| WMELPLUS_00380 | 1422 | gltX1_1 | 6.1.1.17 |         | Glutamate--tRNA ligase 1                             |
| WMELPLUS_00382 | 1800 | sdhA    | 1.3.5.1  |         | Succinate dehydrogenase flavoprotein subunit         |
| WMELPLUS_00384 | 618  | gmk     | 2.7.4.8  | COG0194 | Guanylate kinase                                     |
| WMELPLUS_00387 | 1095 | ychF    |          | COG0012 | Ribosome-binding ATPase YchF                         |
| WMELPLUS_00389 | 1176 | cca     | 2.7.7.72 |         | CCA-adding enzyme                                    |
| WMELPLUS_00393 | 1098 | gap     | 1.2.1.12 | COG0057 | Glyceraldehyde-3-phosphate dehydrogenase             |
| WMELPLUS_00394 | 762  | tatC    |          | COG0805 | Sec-independent protein translocase protein TatC     |
| WMELPLUS_00395 | 456  | argR    |          | COG1438 | Arginine repressor                                   |
| WMELPLUS_00396 | 735  | artP    |          | COG0834 | Arginine-binding extracellular protein ArtP          |
| WMELPLUS_00397 | 648  | artQ    |          | COG0765 | Arginine transport system permease protein ArtQ      |
| WMELPLUS_00398 | 642  | artM    |          | COG1126 | Arginine transport ATP-binding protein ArtM          |
| WMELPLUS_00399 | 363  |         |          | COG3039 | IS5 family transposase ISWpi1                        |
| WMELPLUS_00400 | 342  |         |          | COG3039 | IS5 family transposase ISWpi1                        |
| WMELPLUS_00406 | 675  | pyrF    | 4.1.1.23 | COG0284 | Orotidine 5'-phosphate decarboxylase                 |
| WMELPLUS_00407 | 1323 | smc_2   |          |         | Chromosome partition protein Smc                     |

|                |      |         |          |         |                                                                    |
|----------------|------|---------|----------|---------|--------------------------------------------------------------------|
| WMELPLUS_00409 | 1215 | ftsH_1  | 3.4.24.- |         | ATP-dependent zinc metalloprotease FtsH                            |
| WMELPLUS_00410 | 2595 | valS    | 6.1.1.9  |         | Valine--tRNA ligase                                                |
| WMELPLUS_00411 | 1110 | smc_3   |          |         | Chromosome partition protein Smc                                   |
| WMELPLUS_00412 | 516  | yrdA    |          | COG0663 | Protein YrdA                                                       |
| WMELPLUS_00414 | 1590 | pyrG    | 6.3.4.2  | COG0504 | CTP synthase                                                       |
| WMELPLUS_00415 | 408  | tadA    | 3.5.4.33 | COG0590 | tRNA-specific adenosine deaminase                                  |
| WMELPLUS_00416 | 1203 | proP_3  |          |         | Proline/betaine transporter                                        |
| WMELPLUS_00418 | 1101 | ftsH_2  | 3.4.24.- |         | ATP-dependent zinc metalloprotease FtsH                            |
| WMELPLUS_00419 | 999  | bfmB AB | 1.2.4.4  | COG0022 | 2-oxoisovalerate dehydrogenase subunit beta                        |
| WMELPLUS_00422 | 1797 | lepA    | 3.6.5.-  | COG0481 | Elongation factor 4                                                |
| WMELPLUS_00429 | 741  |         |          | COG0217 | putative transcriptional regulatory protein                        |
| WMELPLUS_00430 | 708  | bam D   |          | COG4105 | Outer membrane protein assembly factor BamD                        |
| WMELPLUS_00432 | 534  | pgsA    | 2.7.8.5  | COG0558 | CDP-diacylglycerol--glycerol-3-phosphate 3-phosphatidyltransferase |
| WMELPLUS_00433 | 1323 | tme     | 1.1.1.40 | COG0280 | NADP-dependent malic enzyme                                        |
| WMELPLUS_00435 | 219  |         |          | COG0271 | putative protein RP812                                             |
| WMELPLUS_00436 | 324  | grxD    |          | COG0278 | Glutaredoxin 4                                                     |
| WMELPLUS_00437 | 1395 | fumC    | 4.2.1.2  | COG0114 | Fumarate hydratase class II                                        |
| WMELPLUS_00438 | 1023 | cgtA    | 3.6.5.-  |         | GTPase Obg/CgtA                                                    |
| WMELPLUS_00439 | 1275 | eno     | 4.2.1.11 |         | Enolase                                                            |
| WMELPLUS_00440 | 1497 | mur C   | 6.3.2.8  | COG0773 | UDP-N-acetylmuramate--L-alanine ligase                             |
| WMELPLUS_00441 | 675  | rlpA    | 4.2.2.-  |         | Endolytic peptidoglycan transglycosylase RlpA                      |
| WMELPLUS_00445 | 1227 | mtaB    | 2.8.4.5  | COG0621 | Threonylcarbamoyladenosine tRNA                                    |

|                |      |        |           |         |                                                                                            |
|----------------|------|--------|-----------|---------|--------------------------------------------------------------------------------------------|
|                |      |        |           |         | methylthiotransferase MtaB                                                                 |
| WMELPLUS_00446 | 1470 | gatA   | 6.3.5.7   | COG0154 | Glutamyl-tRNA(Gln) amidotransferase subunit A                                              |
| WMELPLUS_00454 | 1797 | mutL_1 |           | COG0323 | DNA mismatch repair protein MutL                                                           |
| WMELPLUS_00455 | 441  | rnhA_2 | 3.1.26.4  |         | Ribonuclease H                                                                             |
| WMELPLUS_00472 | 507  | coaD   | 2.7.7.3   | COG0669 | Phosphopantetheine adenylyltransferase                                                     |
| WMELPLUS_00475 | 696  | ispU   | 2.5.1.31  | COG0020 | Ditrans, polycis-undecaprenyl-diphosphate synthase ((2E,6E)-farnesyl-diphosphate specific) |
| WMELPLUS_00478 | 558  | frr    |           | COG0233 | Ribosome-recycling factor                                                                  |
| WMELPLUS_00479 | 744  | pyrH   | 2.7.4.22  | COG0528 | Uridylate kinase                                                                           |
| WMELPLUS_00480 | 861  | tsf    |           | COG0264 | Elongation factor Ts                                                                       |
| WMELPLUS_00481 | 849  | rpsB   |           | COG0052 | 30S ribosomal protein S2                                                                   |
| WMELPLUS_00483 | 372  | yajC   |           | COG1862 | Sec translocon accessory complex subunit YajC                                              |
| WMELPLUS_00484 | 1821 | nodM   | 2.6.1.16  |         | Glutamine--fructose-6-phosphate aminotransferase [isomerizing]                             |
| WMELPLUS_00491 | 1116 | ftsW   | 2.4.1.129 |         | putative peptidoglycan glycosyltransferase FtsW                                            |
| WMELPLUS_00492 | 717  | ubiE   | 2.1.1.163 | COG0226 | Ubiquinone/menaquinone biosynthesis C-methyltransferase UbiE                               |
| WMELPLUS_00493 | 864  | lipA   | 2.8.1.8   |         | Lipoyl synthase                                                                            |
| WMELPLUS_00494 | 315  | rpmB   |           | COG0227 | 50S ribosomal protein L28                                                                  |
| WMELPLUS_00496 | 201  | iscX   |           | COG0975 | Protein IscX                                                                               |
| WMELPLUS_00498 | 615  | rpsD   |           | COG0522 | 30S ribosomal protein S4                                                                   |
| WMELPLUS_00499 | 2073 | tktA   | 2.2.1.1   | COG0021 | Transketolase 1                                                                            |
| WMELPLUS_00502 | 1164 | mdtL   |           |         | Multidrug resistance protein MdtL                                                          |
| WMELPLUS_00508 | 558  | dcd    | 3.5.4.13  | COG0717 | dCTP deaminase                                                                             |

|                |      |        |           |         |                                                            |
|----------------|------|--------|-----------|---------|------------------------------------------------------------|
| WMELPLUS_00509 | 1017 | pstS   |           |         | Phosphate-binding protein PstS                             |
| WMELPLUS_00512 | 1059 | trkI   |           | COG0168 | Trk system potassium uptake protein TrkI                   |
| WMELPLUS_00513 | 1371 |        |           | COG2239 | Magnesium transporter MgtE                                 |
| WMELPLUS_00514 | 1011 | prfB   |           | COG1186 | Peptide chain release factor RF2                           |
| WMELPLUS_00519 | 759  | pstB   | 7.3.2.1   |         | Phosphate import ATP-binding protein PstB                  |
| WMELPLUS_00520 | 786  | dapB   | 1.17.1.8  | COG0289 | 4-hydroxy-tetrahydrodipicolinate reductase                 |
| WMELPLUS_00524 | 801  | znuB   |           | COG1108 | High-affinity zinc uptake system membrane protein ZnuB     |
| WMELPLUS_00526 | 867  | ispE   | 2.7.1.148 | COG1947 | 4-diphosphocytidyl-2-C-methyl-D-erythritol kinase          |
| WMELPLUS_00527 | 3270 | addA   | 3.6.4.12  |         | ATP-dependent helicase/nuclease subunit A                  |
| WMELPLUS_00532 | 1452 | dnaB   | 3.6.4.12  | COG0305 | Replicative DNA helicase                                   |
| WMELPLUS_00534 | 1638 | metG   | 6.1.1.10  |         | Methionine--tRNA ligase                                    |
| WMELPLUS_00536 | 1176 | COQ3_2 | 2.1.1.222 |         | Ubiquinone biosynthesis O-methyltransferase, mitochondrial |
| WMELPLUS_00538 | 1749 | dnaG   | 2.7.7.-   |         | DNA primase                                                |
| WMELPLUS_00539 | 1083 |        |           | COG3177 | putative protein                                           |
| WMELPLUS_00540 | 1035 | aaeA   |           |         | p-hydroxybenzoic acid efflux pump subunit AaeA             |
| WMELPLUS_00547 | 831  | yqfL   | 2.7.11.32 | COG1806 | Putative pyruvate, phosphate dikinase regulatory protein   |
| WMELPLUS_00548 | 711  | ccmC   |           | COG0755 | Heme exporter protein C                                    |
| WMELPLUS_00552 | 1281 | purA   | 6.3.4.4   | COG0104 | Adenylosuccinate synthetase                                |
| WMELPLUS_00554 | 297  |        |           | COG3039 | IS5 family transposase ISCa8                               |
| WMELPLUS_00556 | 264  | infA   |           |         | Translation initiation factor IF-1                         |
| WMELPLUS_00557 | 597  | yhdE   | 3.6.1.9   | COG0424 | dTTP/UTP pyrophosphatase                                   |

|                    |      |            |  |             |                                    |
|--------------------|------|------------|--|-------------|------------------------------------|
| WMELPLUS<br>_00559 | 1344 | alsT_<br>1 |  | COG1<br>115 | Amino-acid carrier<br>protein AlsT |
| WMELPLUS<br>_00563 | 381  |            |  | COG3<br>039 | IS5 family<br>transposase ISWpi1   |

**Table S2.** Genes of wMelPlus *Wolbachia* strain located in “Blue” unique inversion block – region (308921..316275). EC\_number – the enzyme commission number if applicable (only for enzymes). COG – cluster of orthologous groups of proteins.

| locus_tag      | Length (bp) | gene | EC_number | COG     | product                                                                                           |
|----------------|-------------|------|-----------|---------|---------------------------------------------------------------------------------------------------|
| WMELPLUS_00339 | 363         |      |           | COG3039 | IS5 family transposase ISWpi1                                                                     |
| WMELPLUS_00340 | 453         |      |           |         | hypothetical protein                                                                              |
| WMELPLUS_00341 | 1959        |      |           |         | hypothetical protein                                                                              |
| WMELPLUS_00342 | 1173        | sucB | 2.3.1.61  | COG0508 | Dihydrolipoyllysine-residue succinyltransferase component of 2-oxoglutarate dehydrogenase complex |
| WMELPLUS_00343 | 909         | hemC | 2.5.1.61  | COG0181 | Porphobilinogen deaminase                                                                         |
| WMELPLUS_00344 | 888         | murB | 1.3.1.98  | COG0812 | UDP-N-acetylenolpyruvoylglucosamine reductase                                                     |
| WMELPLUS_00345 | 810         |      |           |         | hypothetical protein                                                                              |

**Table S3.** Genes of wMelPlus *Wolbachia* strain located in “Yellow” unique inversion block – region (463923..531364). EC\_number – the enzyme commission number if applicable (only for enzymes). COG – cluster of orthologous groups of proteins.

| locus_tag      | Length (bp) | gene | EC_number | COG     | product                                                      |
|----------------|-------------|------|-----------|---------|--------------------------------------------------------------|
| WMELPLUS_00489 | 741         |      |           |         | hypothetical protein                                         |
| WMELPLUS_00490 | 390         |      |           |         | hypothetical protein                                         |
| WMELPLUS_00491 | 1116        | ftsW | 2.4.1.129 |         | putative peptidoglycan glycosyltransferase FtsW              |
| WMELPLUS_00492 | 717         | ubiE | 2.1.1.163 | COG2226 | Ubiquinone/menaquinone biosynthesis C-methyltransferase UbiE |
| WMELPLUS_00493 | 864         | lipA | 2.8.1.8   |         | Lipoyl synthase                                              |
| WMELPLUS_00494 | 315         | rpmB |           | COG0227 | 50S ribosomal protein L28                                    |
| WMELPLUS_00495 | 342         |      |           |         | hypothetical protein                                         |
| WMELPLUS_00496 | 201         | iscX |           | COG2975 | Protein IscX                                                 |
| WMELPLUS_00497 | 87          |      |           |         | tRNA-Leu(taa)                                                |
| WMELPLUS_00498 | 615         | rpsD |           | COG0522 | 30S ribosomal protein S4                                     |
| WMELPLUS_00499 | 2073        | tktA | 2.2.1.1   | COG0021 | Transketolase 1                                              |
| WMELPLUS_00500 | 189         |      |           |         | WsnRNA46                                                     |
| WMELPLUS_00501 | 1629        |      |           |         | hypothetical protein                                         |
| WMELPLUS_00502 | 1164        | mdtL |           |         | Multidrug resistance protein MdtL                            |
| WMELPLUS_00503 | 138         |      |           |         | WsnRNA46                                                     |
| WMELPLUS_00504 | 816         |      |           |         | hypothetical protein                                         |
| WMELPLUS_00505 | 3336        |      |           |         | hypothetical protein                                         |
| WMELPLUS_00506 | 570         |      |           |         | hypothetical protein                                         |
| WMELPLUS_00507 | 360         |      |           |         | hypothetical protein                                         |
| WMELPLUS_00508 | 558         | dcd  | 3.5.4.13  | COG0717 | dCTP deaminase                                               |
| WMELPLUS_00509 | 1017        | pstS |           |         | Phosphate-binding protein PstS                               |
| WMELPLUS_00510 | 933         |      |           |         | hypothetical protein                                         |
| WMELPLUS_00511 | 432         |      |           |         | hypothetical protein                                         |
| WMELPLUS_00512 | 1059        | trkI |           | COG0168 | Trk system potassium uptake protein TrkI                     |
| WMELPLUS_00513 | 1371        |      |           | COG2239 | Magnesium transporter MgtE                                   |
| WMELPLUS_00514 | 1011        | prfB |           | COG1186 | Peptide chain release factor RF2                             |
| WMELPLUS_00515 | 165         |      |           |         | hypothetical protein                                         |
| WMELPLUS_00516 | 162         |      |           |         | hypothetical protein                                         |
| WMELPLUS_00517 | 198         |      |           |         | hypothetical protein                                         |
| WMELPLUS_00518 | 303         |      |           |         | hypothetical protein                                         |
| WMELPLUS_00519 | 759         | pstB | 7.3.2.1   |         | Phosphate import ATP-binding protein PstB                    |
| WMELPLUS_00520 | 786         | dapB | 1.17.1.8  | COG0289 | 4-hydroxy-tetrahydrodipicolinate reductase                   |
| WMELPLUS_00521 | 1047        |      |           |         | hypothetical protein                                         |
| WMELPLUS_00522 | 993         |      |           |         | hypothetical protein                                         |
| WMELPLUS_00523 | 156         |      |           |         | hypothetical protein                                         |



|                |      |        |           |         |                                                            |
|----------------|------|--------|-----------|---------|------------------------------------------------------------|
| WMELPLUS_00524 | 801  | znuB   |           | COG1108 | High-affinity zinc uptake system membrane protein ZnuB     |
| WMELPLUS_00525 | 366  |        |           |         | hypothetical protein                                       |
| WMELPLUS_00526 | 867  | ispE   | 2.7.1.148 | COG1947 | 4-diphosphocytidyl-2-C-methyl-D-erythritol kinase          |
| WMELPLUS_00527 | 3270 | addA   | 3.6.4.12  |         | ATP-dependent helicase/nuclease subunit A                  |
| WMELPLUS_00528 | 291  |        |           |         | hypothetical protein                                       |
| WMELPLUS_00529 | 675  |        |           |         | hypothetical protein                                       |
| WMELPLUS_00530 | 597  |        |           |         | hypothetical protein                                       |
| WMELPLUS_00531 | 84   |        |           |         | tRNA-Leu(caa)                                              |
| WMELPLUS_00532 | 1452 | dnaB   | 3.6.4.12  | COG0305 | Replicative DNA helicase                                   |
| WMELPLUS_00533 | 1185 |        |           |         | hypothetical protein                                       |
| WMELPLUS_00534 | 1638 | metG   | 6.1.1.10  |         | Methionine--tRNA ligase                                    |
| WMELPLUS_00535 | 441  |        |           |         | hypothetical protein                                       |
| WMELPLUS_00536 | 1176 | COQ3_2 | 2.1.1.222 |         | Ubiquinone biosynthesis O-methyltransferase, mitochondrial |
| WMELPLUS_00537 | 146  |        |           |         | WsnRNA46                                                   |
| WMELPLUS_00538 | 1749 | dnaG   | 2.7.7.-   |         | DNA primase                                                |
| WMELPLUS_00539 | 1083 |        |           | COG3177 | putative protein                                           |
| WMELPLUS_00540 | 1035 | aaeA   |           |         | p-hydroxybenzoic acid efflux pump subunit AaeA             |
| WMELPLUS_00541 | 165  |        |           |         | hypothetical protein                                       |
| WMELPLUS_00542 | 162  |        |           |         | hypothetical protein                                       |
| WMELPLUS_00543 | 198  |        |           |         | hypothetical protein                                       |
| WMELPLUS_00544 | 303  |        |           |         | hypothetical protein                                       |
| WMELPLUS_00545 | 315  |        |           |         | hypothetical protein                                       |
| WMELPLUS_00546 | 129  |        |           |         | hypothetical protein                                       |
| WMELPLUS_00547 | 831  | yqfL   | 2.7.11.32 | COG1806 | Putative pyruvate, phosphate dikinase regulatory protein   |
| WMELPLUS_00548 | 711  | ccmC   |           | COG0755 | Heme exporter protein C                                    |
| WMELPLUS_00549 | 171  |        |           |         | hypothetical protein                                       |
| WMELPLUS_00550 | 183  |        |           |         | hypothetical protein                                       |
| WMELPLUS_00551 | 1596 |        |           |         | hypothetical protein                                       |
| WMELPLUS_00552 | 1281 | purA   | 6.3.4.4   | COG0104 | Adenylosuccinate synthetase                                |
| WMELPLUS_00553 | 153  |        |           |         | hypothetical protein                                       |
| WMELPLUS_00554 | 297  |        |           | COG3039 | IS5 family transposase ISCaa8                              |
| WMELPLUS_00555 | 2478 |        |           |         | hypothetical protein                                       |
| WMELPLUS_00556 | 264  | infA   |           |         | Translation initiation factor IF-1                         |
| WMELPLUS_00557 | 597  | yhdE   | 3.6.1.9   | COG0424 | dTTP/UTP pyrophosphatase                                   |
| WMELPLUS_00558 | 2679 |        |           |         | hypothetical protein                                       |
| WMELPLUS_00559 | 1344 | alsT_1 |           | COG1115 | Amino-acid carrier protein AlsT                            |
| WMELPLUS_00560 | 330  |        |           |         | hypothetical protein                                       |
| WMELPLUS_00561 | 201  |        |           |         | hypothetical protein                                       |
| WMELPLUS_00562 | 408  |        |           |         | hypothetical protein                                       |
| WMELPLUS_00563 | 381  |        |           | COG3039 | IS5 family transposase ISWpi1                              |
